## The ups and downs of birth rate in Switzerland 2020 to 2023 in a historical context

Short title: Birth rates in Switzerland 2020 to 2023

Mathilde Le Vu <sup>1</sup>, Katarina L. Matthes <sup>1</sup>, Kaspar Staub <sup>1,3</sup>

<sup>1</sup> Institute of Evolutionary Medicine, University of Zurich, Switzerland

<sup>2</sup> Swiss School of Public Health SSPH+, Zurich, Switzerland

ORCiDs

Mathilde Le Vu: 0000-0001-9495-4822

Katarina L. Matthes: 0000-0002-5263-3542

Kaspar Staub: 0000-0002-3951-1807

**Correspondence:** PD Dr. Kaspar Staub, Institute of Evolutionary Medicine, University of Zurich, Winterthurerstrasse 190, CH-8057 Zurich, Switzerland, [kaspar.staub@iem.uzh.ch](mailto:kaspar.staub@iem.uzh.ch), +41 44 635 05 13

**Funding:** This work was supported by the Swiss National Science Foundation under Grant 197305.

**Target journal:** Population studies (<https://www.tandfonline.com/journals/rpst20>)

## Abstract

We follow population trends in the birth rate in Switzerland almost up to the present day and place the latest developments during the Covid-19 pandemic in a historical context. The birth rate in 2022 was the lowest it has been since the 1870s, and it seems the trend is continuing in 2023. The latest decline had already begun 1-2 years before Covid-19. Previous pandemics (1890, 1918, 1920, 1957) had each led to a temporary decline in the birth rate around 9 months after the peak of these outbreaks. With Covid-19, this appears more complex. The immediate shock of the global outbreak has not left a negative mark on births in Switzerland. However, during and shortly after the first two pandemic waves and partial shutdowns in 2020, there were more conceptions and thus significantly more births in 2021, in all available subgroups except Italian-speaking Switzerland, and somewhat more pronounced among >30-year-old mothers and second parities. The subsequent decline in births from January 2022 was stronger than the increase in births in 2021. The first part of the 2022 decline falls on conception months in the first half of 2021, when the vaccination campaign started in Switzerland. However, given that the proportion of young people vaccinated by summer was still small, vaccination cannot by itself explain the decline in birth rate. The second part of the 2022 decline is associated with conceptions during the large Omicron wave in winter 2021/2022. The decline appears to continue in 2023, albeit not substantially.

**Keywords:** Monitoring; Population level; Historical pandemics; Spanish flu; Russian flu; Asian flu; Covid-19

## Introduction

At the end of 2023, birth rates are the focus in many places (Danny, 2023). Were there more or fewer births during or after the COVID-19 pandemic crisis, a baby boom or a baby bust? A multinational study showed that in many European countries, the initial pandemic shock in early 2020 was associated with a decline in births nine months later (Sobotka et al., 2023). Subsequently, some European countries reported stable or slightly increasing birth rates in 2021, nine months after the first and second pandemic waves in 2020. From January 2022, many European countries show a marked decline in birth rates, continuing a negative trend that may have started before Covid-19 (Sobotka et al., 2023). In the US, the pattern of birth rates was slightly different, first falling in 2020 to early 2021 (Bailey et al., 2023), and especially after the first and second waves of Covid-19 (Adelman et al., 2023), followed by a smaller than expected upswing in 2022.

Birth rates are known to respond to pandemics and other crises (Lee et al., 2023), including heatwaves and natural disasters such as tsunamis (Barreca et al., 2018; Nobles et al., 2015). In the case of pandemics and epidemics, it has been shown that birth rates appear to drop approximately 9 months after the peak of an outbreak (as was the case with SARS-CoV-1, Zika, and to a lesser extent Ebola), followed by a rebound in births (Pomar et al., 2020). The reasons for this pattern are multifactorial but are likely to be related to deliberate postponement of conception, as well as illness-related natural abortions early in pregnancy during the peak of the outbreak. Most of the evidence on historical pandemics comes from research on the 1918-1920 influenza pandemic ("Spanish flu"), when births declined 9 months after the pandemic peak in Scandinavia (Bloom-Feshbach et al., 2011; Svenn-Erik Mamelund, 2004; Pomar et al., 2020), Britain (Chandra et al., 2018; Chandra & Yu, 2015; Reid, 2005), Japan (Chandra & Yu, 2015), and the United States (Bloom-Feshbach et al., 2011; Chandra et al., 2018). However, some of these aspects are currently being debated in the literature, for example whether the pandemic or the end of the World War is more likely to be associated with these changes in birthrates (Gaddy & Ingholt, 2023; S.-E. Mamelund, 2012).

Following the sharp decline in the birth rate from the 1970s onwards with the introduction of the contraceptive pill, the birth rate in Switzerland has stabilized at a low level in recent decades. The birth rate has been slightly declining for two or three years before the outbreak of the COVID-19 pandemic as Switzerland was hit by the first wave of COVID-19 in the spring of 2020, leading to a partial shutdown from mid-March to early May 2020. The stronger second wave emerged from October 2020 and led to historic excess mortality (Staub et al., 2022), especially among the elderly, accompanied again by a partial shutdown from November 2020 to February 2021, and followed by a gradual easing of these measures. As elsewhere, the circulation of different SARS-CoV-2 strains led to several waves of various intensity in. The large omicron wave, which occurred between November 2021 and April 2022, resulted in very high case numbers but a relatively low mortality. Switzerland was also affected by other events that coincided with the pandemic, such as the outbreak of war in Ukraine in February 2022 and a severe heat wave in the summer of 2022. In addition, COVID-19 led to a rather short-term economic downturn.

For Switzerland, the most recent trends in birth rates in the years 2020 to 2023 in the context of the COVID-19 pandemic and crisis have not yet been scientifically studied. The aim of the present study is to trace the

monthly changes in birth rates during the last two to three years of the COVID-19 pandemic, also for certain population subgroups, and to place the population-level developments in a larger temporal context since the end of the 19th century.

## Data and methods

For this study, we have chosen two different approaches to the official Swiss vital statistics BEVNAT of the Swiss Federal Statistical Office (FSO). BEVNAT is the annual statistics of all births, marriages, divorces, deaths, etc. in Switzerland. On the one hand, we worked with the officially published monthly aggregated numbers of all live births in Switzerland between January 1871 and September 2023. The numbers for January through September 2023 are preliminary (final numbers for the full year 2023 will not be available until later in 2024). On the other hand, we obtained from the FSO all currently available individual data on all births per month from BEVNAT, in fully anonymized form and after signing a data contract (according to the Human Research Act HRA, no ethical approval is required when working with fully anonymized government data). Here we cover the period from January 1989 to December 2022 and have other co-factors such as maternal age, maternal nationality (Swiss vs. non-Swiss), parity at birth (since 2005), sex and vital status of the newborns, and whether it was a multiple birth or not. We also know the language region (German-, French- or Italian-speaking Switzerland) in which the mother lived at the time of the birth. Language region can be considered a rough proxy for cultural, social and behavioral factors, including diet, smoking and alcohol consumption of the parents, as well as genetics (Novembre et al., 2008; Skrivankova et al., 2019). The timing and duration of the earlier pandemics of 1890, 1918-1920, 1957, 1969-1970 and 2009 were obtained from the weekly bulletin of the Federal Office of Public Health (Schweiz Bundesamt für Gesundheitswesen, n.d.).

Birth rates were calculated using the total annual population (source: FSO STATPOP). In a sensitivity analysis, we also calculated all models using the population of women aged 15-49 as the denominator. The monthly expected birth rate is estimated by using a Bayesian hierarchical model in which the last 5 years of the respective birth year are used for the calculation. A Poisson model was used to model the number of births while the population was considered as an offset. Time and seasonality effects were added in the model as random effect using random walk model of order 1 and birth month as fixed effect. Following the model fitting process, we draw 1000 samples from the posterior distribution (the expected number of births). Subsequently, we computed the median and 95% credible intervals (CrI). The over-birth and under-birth rates were then determined by subtracting the expected values from the observed ones and expressing the results as percentages. These estimates are made for all subgroups mentioned above. In addition, using the same Bayesian hierarchical model, we predicted the birthrate from 2021-2023 using the years 2016-2020 as reference birth numbers. All statistical analyses were performed using R Version 4.2.2 (R Core Team, 2022) and all models were fitted using INLA (Integrated Nested Laplace Approximation) ([www.r-inla.org](http://www.r-inla.org)).

## Results

The long-term trend in the monthly birth rate is shown in Figure 1. From the end of the 19th century at the latest, the numbers fell sharply, dropping below the level of 25 live births per 10 000 inhabitants (Supplementary Table S1). There was a temporary dip during the First World War. From the Second World War until the mid-1960s there was a marked increase in births due to baby boom generations. With the introduction of the contraceptive pill, birth rates fell sharply from the 1970s onwards, and have remained below the fertility replacement level of 2.1 children per woman. In recent decades, the birth rate has more or less stabilized at a low level. After a slightly higher birth rate around 2016, the birth rate declined thereafter and until 2019 (Figure 2). In 2021, the second year of the pandemic, there were temporarily significantly more births, before reaching an all-time low of 9.3 live births per 10,000 inhabitants in 2022 (Supplementary Table S1). Preliminary data up to September 2023 suggest that the downward trend is ongoing (Figure 2).

If we look at the impact of previous pandemics on the birth rate, we find different patterns. The so-called “Russian flu”, which peaked in January 1890 and sickened more than two thirds of the population, led to a significant drop in births of -21.8% about nine months later, in October 1890 (**Supplementary Figure S1**). Around 9 months after the First World War outbreak and the general troop mobilization in Switzerland in 1914, fertility rates began to fall and remained low for the duration of the war (**Supplementary Figure S2**). The first two waves of the “Spanish flu” occurred in 1918, at the end of the war, when birth rates had already declined markedly. Although we see the lowest birth rates of the entire war period in mid-1919 (a reduction of -17.1%), about 9 months after the strongest wave of the “Spanish flu”, there is no evidence of significant decline. About 9 months after the end of the war and the end of the second “Spanish flu” wave, there was a marked increase in births (but not statistically significant in our study), which was temporarily interrupted again (by a -18.3% drop), towards the end of 1920, i.e. about 9 months after the strong later pandemic wave, which peaked in February 1920. In the autumn of 1957, Switzerland was hit by the next pandemic. Again, about 9 months after the peak of the “Asian flu”, we see a significant drop in the birth rate of -12.1% (**Supplementary Figure S3**). The following flu pandemic was the “Hong Kong flu”, which also hit Switzerland in the winters of 1968/69 and 1969/70, albeit to a lesser extent. This time we see no effect on the birth rate 9 months later (**Supplementary Figure S4**). The Great Recession of 2008/2009 and the “Swine flu” at the end of 2009 also did not lead to a reduction in births 9 months later, but in the case of the “Swine flu” a significant increase in births can be seen around 9 months after the end of the pandemic wave (**Supplementary Figure S5**).

If we look at the trend in recent years, we there is no evidence of significant change at the population level in Switzerland around 9 months after the declaration of the COVID-19 pandemic and the first immediate pandemic shock at the beginning of 2020 compared to the expected values (**Figure 2 and Table 1**). On the other hand, we find a significant +4.5% to +9.4% increase in the birth rate in two periods in 2021, associated with conceptions during and shortly after each of the two pandemic waves and the associated partial shutdowns in 2020. From January 2022, the relative differences in the birth rate compared to the expected values are significantly negative (-7.3% to -11.5%). The first months of this decline are associated with conceptions in the first quarter of 2021, when the vaccination campaign officially started in Switzerland. However, young adults without pre-existing conditions were not eligible for vaccination until May 2021, and among 20–40-year-olds, the rate of double vaccinated people did not exceed 33% until July 2021 and 50% until September 2021 (this

would correspond to births in April and June 2022). The second half of the significant decline in 2022 is associated with conceptions in the winter of 2021/2022, when the first major Omicron wave raged in Switzerland. The negative trend also continues in the provisional data for 2023, although the differences to the expected value mostly did not reach statistical significance (including from March to May 2023 and thus around 9 months after the 2022 heatwave). A sensitivity analysis with the 15–49-year-old women as the denominator instead of the total population reaches very similar results. The monthly trend in the sex ratio at birth has been stable for many years and has not changed noticeably in recent years (**Supplementary Figure S6**).

If the birth peak in 2021 is not considered when estimating birth rates, it becomes clear that births in 2022 and 2023 will only follow the trend of declining births that already began in the years before the pandemic (**Figure 3**). The observed births 2022-2023 are slightly lower than the expected births (which is probably due to the excess birth rate in 2021), but still follow the negative trend of birth rates since 2016.

Based on the individual data, we can also track the trends up to the end of 2022 for certain subgroups of the population (Table 1). The overall pattern (first significantly more births in 2021 and then significantly fewer births in 2022) is also seen in most of the subgroups. The increase in births in 2021 appears to have been slightly stronger in second parities, and slightly weaker in mothers aged <30 years. In Italian-speaking Switzerland and in the case of third and more parities, the increase in 2021 hardly seems to have taken place. The decline in births in 2022 appears to be slightly more pronounced and/or longer in German-speaking Switzerland than in Latin Switzerland, and slightly more pronounced among Swiss mothers, mothers over 30 years old, and among non-primiparous women.

## Discussion

We follow population trends in the birth rate in Switzerland almost up to the present day and place the latest developments during the Covid-19 pandemic in a historical context. The birth rate in 2022 was the lowest it has been since the 1870s, and it seems the trend is continuing in 2023. The latest decline had already begun 1-2 years before Covid-19. Previous pandemics (1890, 1918, 1920, 1957) had each led to a temporary decline in the birth rate around 9 months after the peak of these outbreaks. With Covid-19, this appears more complex. The immediate shock of the global outbreak has not left a negative mark on births in Switzerland. However, during and shortly after the first two pandemic waves and partial shutdowns in 2020, there were more conceptions and thus significantly more births in 2021, in all available subgroups except Italian-speaking Switzerland, and somewhat more pronounced among >30-year-old mothers and second parities. The subsequent decline in births from January 2022 was stronger than the increase in births in 2021. The first part of the 2022 decline falls on conception months in the first half of 2021, when the vaccination campaign started in Switzerland. However, given that the proportion of young people vaccinated by summer was still small, vaccination cannot by itself explain the decline in birth rate. The second part of the 2022 decline is associated with conceptions during the large Omicron wave in winter 2021/2022. The decline appears to continue in 2023, albeit not substantially.

The short-term shifts in the Swiss birth rate described above are remarkable and show both similarities and differences to other countries. In contrast to other countries (Sobotka et al., 2023), the initial pandemic shock in Switzerland at the beginning of 2020 did not lead to a significant drop in the birth rate 9 months later at the end of 2020. The subsequent double-peak increase in 2021, nine months after each of the two pandemic waves and shutdown phases in 2020, also occurred with varying magnitude in many other countries. However, the short-term boom was less pronounced in neighboring countries (Germany, Austria and Italy) (Sobotka et al., 2023). Only France recorded similar increases in 2021 than those reported here. The sharp decline during 2022 is also observed in many other countries, including France, Germany, and Austria (DESTATIS, 2023; Insee, 2023; StatistikAustria, 2023). However, the extent of the short-term ups and downs appears to have been particularly pronounced in Switzerland compared with other countries (Sobotka et al., 2023).

Looking back at past pandemics, we can also confirm the temporary decline in births in Switzerland in mid-1919, around nine months after the most severe phase of the "Spanish flu" in Fall and Winter 1918, as in other countries (Bloom-Feshbach et al., 2011; Pomar et al., 2020). This was followed by an increase in births in 1920, although the effects of the end of the war and the end of the pandemic can hardly be separated, even in countries not directly involved in the war (Gaddy & Ingholt, 2023; S.-E. Mamelund, 2012). We also add to the literature by showing that in Switzerland the "Russian flu" in 1890, the strong "Spanish flu" later wave in 1920 and the "Asian flu" in 1957 also led to a short-term drop in births around nine months after the pandemic peaks. In the case of the 1890 Russian flu, the authorities at the time were already aware of it (Schmid, 1895), and explained the lack of births around 9 months after the pandemic peak with postponed conceptions as well as natural and infection-related abortions early in pregnancy, which would escape statistics (Schmid, 1895). In the case of the 1918 and 1920 waves of the "Spanish flu", there is no evidence of a significantly decline in Switzerland, but this is also due to the width of the intervals around the expected values, which is caused by the fluctuations of the war years. As far as we know, there are not many comparative studies on birth rates and fertility during these other historical pandemics, but in Switzerland the 1890, 1918-1920, and 1957 pandemics were the strongest before COVID-19 (Staub et al., 2022), and the respective authorities at the time estimated that at least two thirds of the population fell ill during each of these pandemics. This was not the case with the later and weaker pandemics of 1968-70 ("Hong Kong flu") or 2009 ("Swine flu"), which were not associated with a decline in birth rates in Switzerland.

Usually, crises and pandemics tend to have a negative effect on the birth rate (Lee et al., 2023). The temporary but significant baby boom in 2021 and around 9 months after the first two waves of the Covid-19 pandemic and the associated shutdowns in 2020 is therefore rather surprising. There are certainly several reasons for this. On the one hand, thanks to the strong public health interventions (including two partial shutdowns), the number of infections among the population was still relatively low in 2020. This assumption is supported by seroprevalence studies carried out at the time, which showed that after the first wave in spring, around 12% of the population had antibodies in their blood, and this level only increased to around 25% during the second wave in autumn/winter 2020 (and thus shortly before the start of the vaccination campaign) (West et al., 2020). This means that the risk of infection-related abortions in Switzerland was probably still rather low

in 2020. During the shutdowns, people obviously spent more time at home, which could have improved the work-personal life balance and increased the frequency of intercourse. This could explain the increase in both planned and unplanned (Lewis et al., 2021) pregnancies, perhaps also in the sense of bringing planned pregnancies forward. We also see that the two increases in the number of conceptions in 2021 lasted for a short time after the measures were lifted. The end of the partial shutdowns and the perceived threat of a pandemic may have led to a mood of optimism when it comes to family planning.

The start of the significant decline in births from January 2022 is associated with conceptions from March 2021. Again, there are various possible reasons, which are not necessarily exclusive. If there was a preponement of pregnancies in 2020 as described above, this could have resulted in a negative rebound from Spring 2021. In addition, the vaccination campaign officially started at the beginning of 2021, but young people without pre-existing conditions were not officially eligible for the vaccination until late April 2021. This could have led to pregnancies being postponed until after vaccination, as has been suggested for other countries. At present, the evidence is rapidly growing that the coronavirus vaccination itself cannot be directly and biologically linked to the decline in births and fertility (Wang et al., 2023; Zaçe et al., 2022). This unanimous opinion is supported by a growing number of studies with different designs and on male and female fertility (Aharon et al., 2022; Ba et al., 2023; Barda et al., 2022; Gonzalez et al., 2021; Morris, 2021; Reschini et al., 2022; Yang et al., 2023; Yildiz et al., 2023) and miscarriage (Yland et al., 2023; Zauche et al., 2021), including already some review articles (Rimmer et al., 2023; Wesselink et al., 2022; Zhang et al., 2023; Zhu et al., 2023). Several studies report changes in the duration of menstrual cycle length following COVID-19 vaccination (Alvergne et al., 2023), but these changes are small ( $\pm 1$  day) and resume in the next cycle, thus not threatening fertility (Alvergne, 2023). Furthermore, the causality cannot be proven because the pandemic could have affected menstrual cycle in other ways than through vaccination. In the case of Switzerland, the timing also speaks against such a direct effect. The decline in births at the beginning of 2022 and thus in conceptions from spring 2021 was already ongoing for several months before young people in Switzerland were able to be vaccinated, and before >30% of the 20-40 age group were double vaccinated in July 2021.

Where there is a relatively large body of evidence, however, is how single and multiple COVID-19 infections can harm male and female fertility (Aksak et al., 2022; Chen et al., 2021; Harb et al., 2022; Hosseini et al., 2023; Martinez et al., 2023; Patel et al., 2021; Saadedine et al., 2023; Wesselink et al., 2022). And this could be the reason for the decline in births in the second half of 2022. The conception of these pregnancies goes back to the fall/winter of 2021/2022 when the long and massive first Omicron wave hit the Swiss population, and this time a significant proportion of the population fell ill. Overall, the idea that vaccination would be linked to infertility is not supported by scientific evidence, while on the other hand COVID-19 disease itself is associated with infertility in both sexes, tipping the scale in favor of disease. The fact that the birth rate continues to fall in 2023, albeit no evidence of significantly fall in this study, may also be related to the increasingly uncertain economic situation in Switzerland. Although unemployment never increased massively during the Covid-19 crisis, the consumer price index has been rising steadily and markedly since 2021, which is currently leading to a noticeable loss of real wages while nominal wages remain stable (**Supplementary Figures S7 & S8**). The more frequent heatwaves could also have a certain influence, as studies have already



linked such extreme climatic events to reduced fertility (Barreca et al., 2018). The increasingly uncertain political situation in the world, for example with the start of the war in Ukraine in February 2022, could also have an impact on family planning.

Finally, life planning decisions are central (Tasneem et al., 2023). Birth rates had already been falling slightly for a few years before the Covid-19 pandemic in Switzerland. In 2018, around 9% of young people said in a nationwide survey that they did not want to have children (Schweiz. Bundesamt für Statistik BFS, 2018). Vasectomies are also on the increase. It is possible that a change in values is taking place at a societal level, and that some young people simply want to have fewer children now, or in general (Guzzo & Hayford, 2023). A possible explanation for the decision to not have children is anxiety about climate change, also known as eco-anxiety, but also economic or general insecurity could be further reasons (Danny, 2023; Dillarstone et al., 2023)

The present study has several limitations. Firstly, it operates at the population level, which means that there is a lack of in-depth variation in the individual data. For example, at the individual level, nothing can be said about the socio-economic background or other relevant subgroups of the population. Secondly, the natural time lag between conception and birth makes it difficult to interpret the birth rate. The life decisions that are made now are not reflected in the birth rate only about 9 months later. In addition, this temporal lag must be approximated on an ecological level by means of a 9-month distance, as the exact date of birth of the children is not accessible for data protection reasons, which would allow the time of conception to be narrowed down more precisely by means of the gestational age. Thirdly, most official statistics are based on live births only. While stillbirths are fortunately rather rare in Switzerland today (<4.5/1000 yearly between 2020 and 2022), this was not the case a few decades ago, let alone at the end of the 19th century. Unfortunately, there are no monthly stillbirth figures for Switzerland for the time 1871 to 1987 that would allow these cases to be considered in our analyses. Finally, there is no central database in Switzerland in which new pregnancies are registered. This means that the number of births cannot be verified with reliable statistics on new pregnancies or abortions.

Societies and even specific subgroups such as young people are by no means a homogeneous group. That diversity potentially explains in different ways the decrease in births. The present study described the surprising and short-term shifts in the birth rate in Switzerland in the last two to three years at the population level. More in-depth studies of different designs and at different meso and micro levels must now follow to better understand these more or less active fertility decisions.

## **Author statements**

**Acknowledgements:** We would like to thank the Swiss Federal Statistical Office for providing the fully anonymized data 1987-2022 and further information, as well as Marcel Zwahlen and Sven-Erik Mamelund for their helpful comments.

**Funding:** This work was supported by the Swiss National Science Foundation under Grant 197305.

**Competing interests:** The authors declare no competing interests.

**Ethics committee approval:** Ethics approval was not required for the reuse of these publicly available and fully anonymized Federal authority data.

## **Reproducible Research Statement:**

Statistical code: Available at GitHub

Aggregated data: Available at GitHub

## Bibliography

- Adelman, S., Charifson, M., Seok, E., Mehta-Lee, S. S., Brubaker, S. G., Liu, M., & Kahn, L. G. (2023). State-specific fertility rate changes across the USA following the first two waves of COVID-19. *Human Reproduction*, 38(6), 1202–1212. <https://doi.org/10.1093/humrep/dead055>
- Aharon, D., Lederman, M., Ghofranian, A., Hernandez-Nieto, C., Canon, C., Hanley, W., Gounko, D., Lee, J. A., Stein, D., Buyuk, E., & Copperman, A. B. (2022). In Vitro Fertilization and Early Pregnancy Outcomes After Coronavirus Disease 2019 (COVID-19) Vaccination. *Obstetrics & Gynecology*, 139(4), 490–497. <https://doi.org/10.1097/AOG.00000000000004713>
- Aksak, T., Satar, D. A., Bağcı, R., Gültekin, E. O., Coşkun, A., & Demirdelen, U. (2022). Investigation of the effect of COVID-19 on sperm count, motility, and morphology. *Journal of Medical Virology*, 94(11), 5201–5205. <https://doi.org/10.1002/jmv.27971>
- Alvergne, A. (2023). Why we must fight ignorance about COVID-19 vaccines and menstrual cycles. *Trends in Molecular Medicine*, 29(9), 678–680. <https://doi.org/10.1016/j.molmed.2023.06.005>
- Alvergne, A., Kountourides, G., Argentieri, M. A., Agyen, L., Rogers, N., Knight, D., Sharp, G. C., Maybin, J. A., & Olszewska, Z. (2023). A retrospective case-control study on menstrual cycle changes following COVID-19 vaccination and disease. *IScience*, 26(4), 106401. <https://doi.org/10.1016/j.isci.2023.106401>
- Ba, Z., Yang, A., Zhu, S., Li, Y., Ma, J., Zhang, Y., Li, Z., & Chen, F. (2023). Comprehensive evaluation of the effect of inactivated SARS-CoV-2 vaccination on female fertility: A retrospective cohort study. *Journal of Medical Virology*, 95(10). <https://doi.org/10.1002/jmv.29161>
- Bailey, M. J., Currie, J., & Schwandt, H. (2023). The COVID-19 baby bump in the United States. *Proceedings of the National Academy of Sciences*, 120(34). <https://doi.org/10.1073/pnas.2222075120>
- Barda, S., Laskov, I., Grisaru, D., Lehavi, O., Kleiman, S., Wenkert, A., Azem, F., Hauser, R., & Michaan, N. (2022). The impact of COVID-19 vaccine on sperm quality. *International Journal of Gynecology & Obstetrics*, 158(1), 116–120. <https://doi.org/10.1002/ijgo.14135>
- Barreca, A., Deschenes, O., & Guldi, M. (2018). Maybe Next Month? Temperature Shocks and Dynamic Adjustments in Birth Rates. *Demography*, 55(4), 1269–1293. <https://doi.org/10.1007/s13524-018-0690-7>
- Bloom-Feshbach, K., Simonsen, L., Viboud, C., Mølbak, K., Miller, M. A., Gottfredsson, M., & Andreasen, V. (2011). Natality Decline and Miscarriages Associated With the 1918 Influenza Pandemic: The Scandinavian and United States Experiences. *The Journal of Infectious Diseases*, 204(8), 1157–1164. <https://doi.org/10.1093/infdis/jir510>
- Chandra, S., Christensen, J., Mamelund, S.-E., & Paneth, N. (2018). Short-Term Birth Sequelae of the 1918–1920 Influenza Pandemic in the United States: State-Level Analysis. *American Journal of Epidemiology*, 187(12), 2585–2595. <https://doi.org/10.1093/aje/kwy153>

- Chandra, S., & Yu, Y.-L. (2015). The 1918 influenza pandemic and subsequent birth deficit in Japan. *Demographic Research*, 33, 313–326. <https://doi.org/10.4054/DemRes.2015.33.11>
- Chen, F., Zhu, S., Dai, Z., Hao, L., Luan, C., Guo, Q., Meng, C., & Zhang, Y. (2021). Effects of COVID-19 and mRNA vaccines on human fertility. *Human Reproduction*, 37(1), 5–13. <https://doi.org/10.1093/humrep/deab238>
- Danny, D. (2023). World population projections: Just little bits of history repeating? *Significance*, 20(4), 22–27. <https://doi.org/10.1093/jrssig/qmad062>
- DESTATIS. (2023). *Geburten: Veränderung der Zahl der Lebendgeborenen zum jeweiligen Vorjahr*. <https://www.destatis.de/DE/Themen/Gesellschaft-Umwelt/Bevoelkerung/Geburten/Tabellen/lebendgeborene-differenz.html>
- Dillarstone, H., Brown, L. J., & Flores, E. C. (2023). Climate change, mental health, and reproductive decision-making: A systematic review. *PLOS Climate*, 2(11), e0000236. <https://doi.org/10.1371/journal.pclm.0000236>
- Gaddy, H., & Ingholt, M. M. (2023). Did the 1918 influenza pandemic cause a 1920 baby boom? Demographic evidence from neutral Europe. *Population Studies*, 1–19. <https://doi.org/10.1080/00324728.2023.2192041>
- Gonzalez, D. C., Nassau, D. E., Khodamoradi, K., Ibrahim, E., Blachman-Braun, R., Ory, J., & Ramasamy, R. (2021). Sperm Parameters Before and After COVID-19 mRNA Vaccination. *JAMA*, 326(3), 273. <https://doi.org/10.1001/jama.2021.9976>
- Guzzo, K. B., & Hayford, S. R. (2023). Evolving Fertility Goals and Behaviors in Current U.S. Childbearing Cohorts. *Population and Development Review*, 49(1), 7–42. <https://doi.org/10.1111/padr.12535>
- Harb, J., Debs, N., Rima, M., Wu, Y., Cao, Z., Kovacic, H., Fajloun, Z., & Sabatier, J.-M. (2022). SARS-CoV-2, COVID-19, and Reproduction: Effects on Fertility, Pregnancy, and Neonatal Life. *Biomedicines*, 10(8), 1775. <https://doi.org/10.3390/biomedicines10081775>
- Hosseini, E., Kohan-Ghadr, H.-R., Bazrafkan, M., Amorim, C. A., Askari, M., Zakeri, A., Mousavi, S. N., Kafaeinezhad, R., Afradiasbagharani, P., Esfandyari, S., & Nazari, M. (2023). Rescuing fertility during COVID-19 infection: exploring potential pharmacological and natural therapeutic approaches for comorbidity, by focusing on NLRP3 inflammasome mechanism. *Journal of Assisted Reproduction and Genetics*, 40(5), 1173–1185. <https://doi.org/10.1007/s10815-023-02768-1>
- Insee. (2023). *Bilan démographique 2022*. Insee Première.
- Lee, D. S., Batyra, E., Castro, A., & Wilde, J. (2023). Human fertility after a disaster: a systematic literature review. *Proceedings of the Royal Society B: Biological Sciences*, 290(1998). <https://doi.org/10.1098/rspb.2023.0211>
- Lewis, R., Blake, C., Shimonovich, M., Coia, N., Duffy, J., Kerr, Y., Wilson, J., Graham, C. A., & Mitchell,

- K. R. (2021). Disrupted prevention: condom and contraception access and use among young adults during the initial months of the COVID-19 pandemic. An online survey. *BMJ Sexual & Reproductive Health*, 47(4), 269–276. <https://doi.org/10.1136/bmjsexrh-2020-200975>
- Mamelund, S.-E. (2012). Fertility Fluctuations in Times of War and Pandemic Influenza. *Journal of Infectious Diseases*, 206(1), 140–141. <https://doi.org/10.1093/infdis/jis315>
- Mamelund, Svenn-Erik. (2004). Can the Spanish Influenza Pandemic of 1918 Explain the Baby Boom of 1920 in Neutral Norway? *Population (English Edition, 2002-)*, 59(2), 229. <https://doi.org/10.2307/3654904>
- Martinez, M. S., Ferreyra, F. N., Paira, D. A., Rivero, V. E., Olmedo, J. J., Tissera, A. D., Molina, R. I., & Motrich, R. D. (2023). COVID-19 associates with semen inflammation and sperm quality impairment that reverses in the short term after disease recovery. *Frontiers in Physiology*, 14. <https://doi.org/10.3389/fphys.2023.1220048>
- Morris, R. S. (2021). SARS-CoV-2 spike protein seropositivity from vaccination or infection does not cause sterility. *F&S Reports*, 2(3), 253–255. <https://doi.org/10.1016/j.xfre.2021.05.010>
- Nobles, J., Frankenberg, E., & Thomas, D. (2015). The Effects of Mortality on Fertility: Population Dynamics After a Natural Disaster. *Demography*, 52(1), 15–38. <https://doi.org/10.1007/s13524-014-0362-1>
- Novembre, J., Johnson, T., Bryc, K., Kutalik, Z., Boyko, A. R., Auton, A., Indap, A., King, K. S., Bergmann, S., Nelson, M. R., Stephens, M., & Bustamante, C. D. (2008). Genes mirror geography within Europe. *Nature*, 456(7218), 98–101. <https://doi.org/10.1038/nature07331>
- Patel, D. P., Punjani, N., Guo, J., Alukal, J. P., Li, P. S., & Hotaling, J. M. (2021). The impact of SARS-CoV-2 and COVID-19 on male reproduction and men’s health. *Fertility and Sterility*, 115(4), 813–823. <https://doi.org/10.1016/j.fertnstert.2020.12.033>
- Pomar, L., Contier, A., Harris, J. E., Favre, G., Nielsen-Saines, K., & Baud, D. (2020). Potential Consequences of Sars-Cov-2 Pandemic on Birth Rates and Subsequent Demographics. *Investigations in Gynecology Research & Womens Health (IGRWH)*, 3(5). <https://doi.org/10.31031/IGRWH.2020.03.000574>
- R Core Team. (2022). R core team (2022). In *R: A language and environment for statistical computing*. R Foundation for Statistical Computing, Vienna, Austria. URL <http://www.R-project.org>.
- Reid, A. (2005). The Effects of the 1918–1919 Influenza Pandemic on Infant and Child Health in Derbyshire. *Medical History*, 49(1), 29–54. <https://doi.org/10.1017/S0025727300008279>
- Reschini, M., Pagliardini, L., Boeri, L., Piazzini, F., Bandini, V., Fornelli, G., Dolci, C., Cermisoni, G. C., Viganò, P., Somigliana, E., Coccia, M. E., & Papaleo, E. (2022). COVID-19 Vaccination Does Not Affect Reproductive Health Parameters in Men. *Frontiers in Public Health*, 10. <https://doi.org/10.3389/fpubh.2022.839967>

- Rimmer, M. P., Teh, J. J., Mackenzie, S. C., & Al Wattar, B. H. (2023). The risk of miscarriage following COVID-19 vaccination: a systematic review and meta-analysis. *Human Reproduction*, *38*(5), 840–852. <https://doi.org/10.1093/humrep/dead036>
- Saadetine, M., El Sabeh, M., Borahay, M. A., & Daoud, G. (2023). The influence of COVID-19 infection-associated immune response on the female reproductive system. *Biology of Reproduction*, *108*(2), 172–182. <https://doi.org/10.1093/biolre/ioac187>
- Schmid, F. (1895). *Die Influenza in Der Schweiz in den Jahren 1889-1894* (Francke (ed.)).
- Schweiz. Bundesamt für Statistik BFS. (2018). *Kinderwunsch, Elternschaft*. <https://www.bfs.admin.ch/bfs/de/home/statistiken/bevoelkerung/familien/kinderwunsch-elternschaft.html>
- Schweiz Bundesamt für Gesundheitswesen. (n.d.). *Bulletin des Eidgenössischen Gesundheitsamtes, 1920-1979*. Hallwag.
- Skrivankova, V., Zwahlen, M., Adams, M., Low, N., Kuehni, C., & Egger, M. (2019). Spatial epidemiology of gestational age and birth weight in Switzerland: census-based linkage study. *BMJ Open*, *9*(10), e027834. <https://doi.org/10.1136/bmjopen-2018-027834>
- Sobotka, T., Zeman, K., Jasilioniene, A., Winkler-Dworak, M., Brzozowska, Z., Alustiza-Galarza, A., Németh, L., & Jdanov, D. (2023). Pandemic Roller-Coaster? Birth Trends in Higher-Income Countries During the COVID-19 Pandemic. *Population and Development Review*. <https://doi.org/10.1111/padr.12544>
- StatistikAustria. (2023). *Demographische Merkmale von Geborenen*.
- Staub, K., Panczak, R., Matthes, K. L., Floris, J., Berlin, C., Junker, C., Weitkunat, R., Mamelund, S.-E., Zwahlen, M., & Riou, J. (2022). Historically High Excess Mortality During the COVID-19 Pandemic in Switzerland, Sweden, and Spain. *Annals of Internal Medicine*, *175*(4), 523–532. <https://doi.org/10.7326/M21-3824>
- Tasneem, N., Atiqul Haq, S. M., Ahmed, M. N. Q., & Ahmed, K. J. (2023). Fertility decisions in the wake of COVID-19: a comprehensive review of influencing determinants and trends. *SN Social Sciences*, *3*(8), 135. <https://doi.org/10.1007/s43545-023-00729-0>
- Wang, C., Wang, M., Li, G., Song, B., Xing, Q., & Cao, Y. (2023). Effects of COVID-19 vaccination on human fertility: a post-pandemic literature review. *Annals of Medicine*, *55*(2). <https://doi.org/10.1080/07853890.2023.2261964>
- Wesselink, A. K., Hatch, E. E., Rothman, K. J., Wang, T. R., Willis, M. D., Yland, J., Crowe, H. M., Geller, R. J., Willis, S. K., Perkins, R. B., Regan, A. K., Levinson, J., Mikkelsen, E. M., & Wise, L. A. (2022). A Prospective Cohort Study of COVID-19 Vaccination, SARS-CoV-2 Infection, and Fertility. *American Journal of Epidemiology*, *191*(8), 1383–1395. <https://doi.org/10.1093/aje/kwac011>

- West, E. A., Anker, D., Amati, R., Richard, A., Wisniak, A., Butty, A., Albanese, E., Bochud, M., Chiolero, A., Crivelli, L., Cullati, S., D'Acremont, V., Epure, A. M., Fehr, J., Flahault, A., Fornerod, L., Frank, I., Frei, A., Michel, G., ... Puhan, M. A. (2020). Corona Immunitas: study protocol of a nationwide program of SARS-CoV-2 seroprevalence and seroepidemiologic studies in Switzerland. *International Journal of Public Health*, 65(9), 1529–1548. <https://doi.org/10.1007/s00038-020-01494-0>
- Yang, L., Neal, S., Lee, T., Chou, A., Schutt, A. K., & Gibbons, W. (2023). Comparison of Female Ovarian Reserve Before vs After COVID-19 Vaccination. *JAMA Network Open*, 6(6), e2318804. <https://doi.org/10.1001/jamanetworkopen.2023.18804>
- Yildiz, E., Timur, B., Guney, G., & Timur, H. (2023). Does the SARS-CoV-2 mRNA vaccine damage the ovarian reserve? *Medicine*, 102(20), e33824. <https://doi.org/10.1097/MD.00000000000033824>
- Yland, J. J., Wesselink, A. K., Regan, A. K., Hatch, E. E., Rothman, K. J., Savitz, D. A., Wang, T. R., Huybrechts, K. F., Hernández-Díaz, S., Eisenberg, M. L., & Wise, L. A. (2023). A prospective cohort study of preconception COVID-19 vaccination and miscarriage. *Human Reproduction*. <https://doi.org/10.1093/humrep/dead211>
- Zaçe, D., La Gatta, E., Petrella, L., & Di Pietro, M. L. (2022). The impact of COVID-19 vaccines on fertility-A systematic review and meta-analysis. *Vaccine*, 40(42), 6023–6034. <https://doi.org/10.1016/j.vaccine.2022.09.019>
- Zauche, L. H., Wallace, B., Smoots, A. N., Olson, C. K., Oduyebo, T., Kim, S. Y., Petersen, E. E., Ju, J., Beauregard, J., Wilcox, A. J., Rose, C. E., Meaney-Delman, D. M., & Ellington, S. R. (2021). Receipt of mRNA Covid-19 Vaccines and Risk of Spontaneous Abortion. *New England Journal of Medicine*, 385(16), 1533–1535. <https://doi.org/10.1056/NEJMc2113891>
- Zhang, L., Sun, X., Wang, R., & Ma, F. (2023). Effect of COVID-19 vaccination on the outcome of in vitro fertilization: A systematic review and meta-analysis. *Frontiers in Public Health*, 11. <https://doi.org/10.3389/fpubh.2023.1151999>
- Zhu, S., Luan, C., Zhang, S., Wang, X., Long, F., Zhang, Q., & Yan, J. (2023). Effect of SARS-CoV-2 infection and vaccine on ovarian reserve: a systematic review. *European Journal of Obstetrics and Gynecology and Reproductive Biology*. <https://doi.org/10.1016/j.ejogrb.2023.10.029>

## Figures and tables

**Figure 1:** The long-term trend in the monthly live birth rate in Switzerland from 1871 to 2023. The annual data, also in relation to women aged 15-49 and the number of stillbirths, can be found in Supplementary Table S1. The monthly data for January to September 2023 are still provisional. (+9m. = 9 months after...)

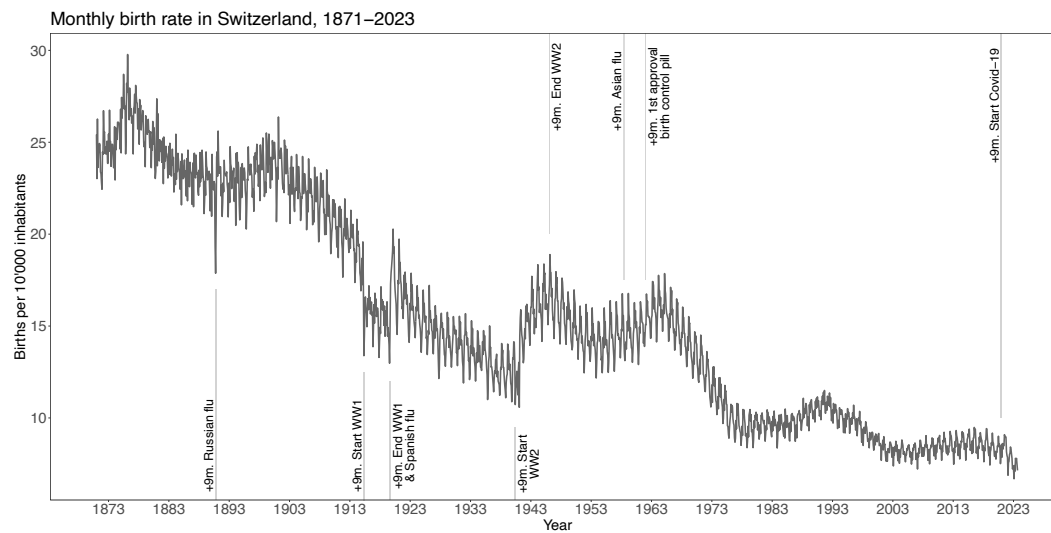



**Figure 2:** The monthly live birth rate in Switzerland from 2016 to 2023. Top: The observed values (red) compared with the expected values (grey, with interval). Below: The same numbers converted into relative differences, expressed in per cent (red=significant differences). A: The time period 9 months after the first COVID-19 wave in Spring 2020 and the associated partial shutdown; B: The time period 9 months after the second COVID-19 wave in Fall and Winter 2020/2021 and the associated partial shutdown; C: The time period 9 months after the share of double-vaccinated young persons aged 20-40 years surpassed 30% to 50%; D: The time period 9 months after the large Omicron wave in Winter 2021/2022; E: The time period 9 months after the heat wave in Summer 2022.

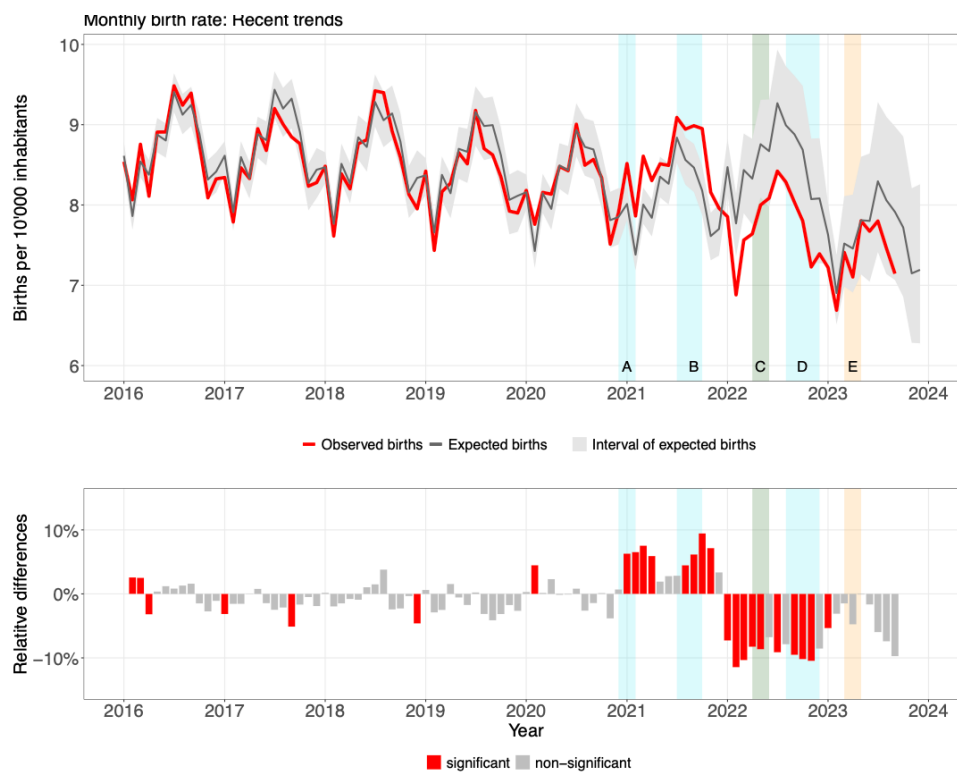

**Figure 3:** The monthly live birth rate in Switzerland from 2016 to 2023 (red line) and the predicted births (grey line) from 2021-2023 considering 2016-2020 as reference births rate. A: The time period 9 months after the first COVID-19 wave in Spring 2020 and the associated partial shutdown; B: The time period 9 months after the second COVID-19 wave in Fall and Winter 2020/2021 and the associated partial shutdown; C: The time period 9 months after the share of double-vaccinated young persons aged 20-40 years surpassed 30% to 50%; D: The time period 9 months after the large Omicron wave in Winter 2021/2022; E: The time period 9 months after the heat wave in Summer 2022.

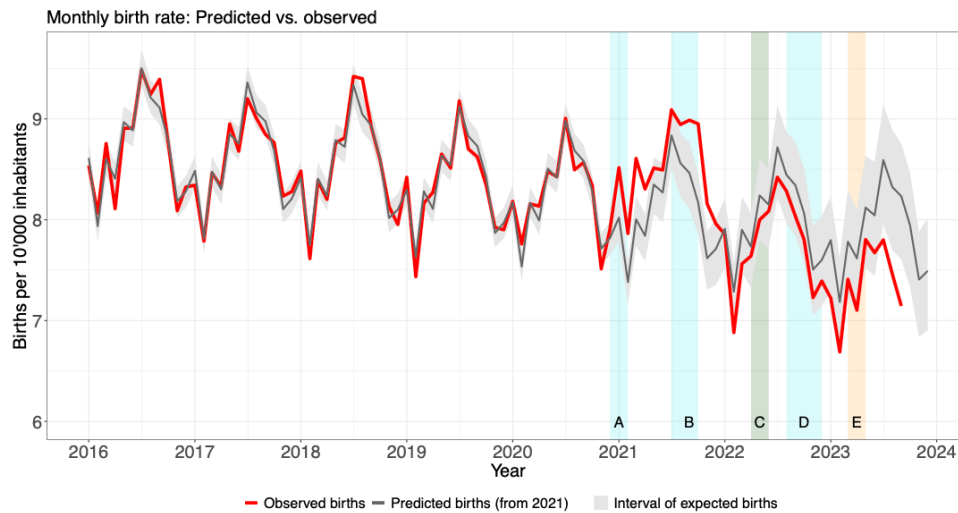

**Table 1:** The monthly live birth rate in Switzerland from 2018 to 2022, shown as relative differences (expressed in percent) between observed vs. expected values for the overall trend and for available subgroups based on individual data. Only significant differences are color-coded.

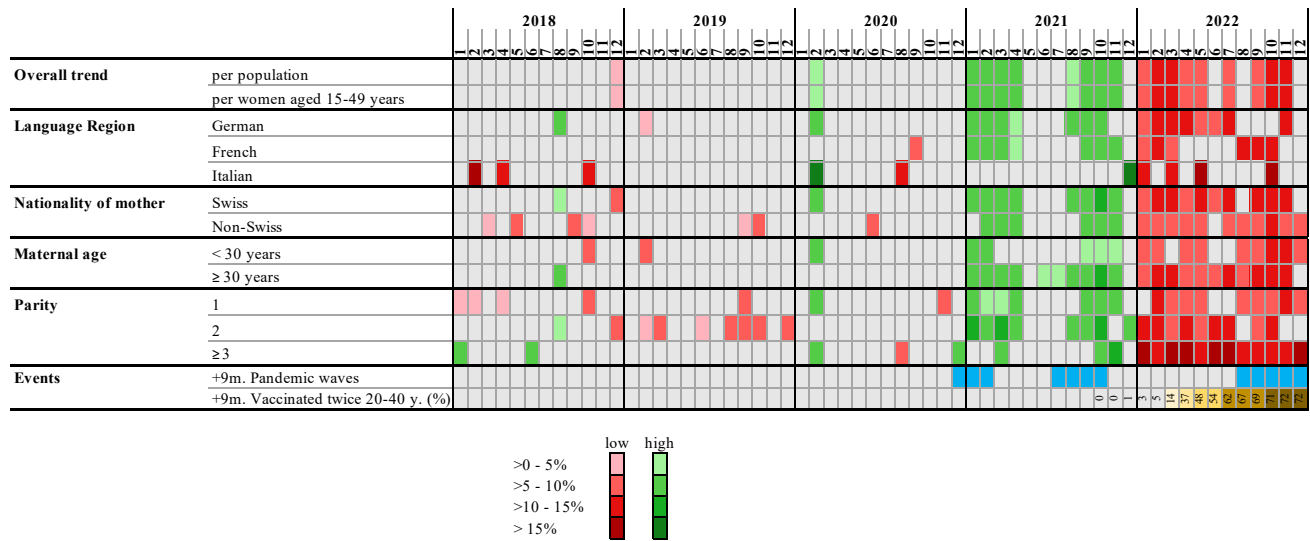

## Supplementary Material

**Supplementary Figure S1:** The monthly live birth rate in Switzerland from 1885 to 1895. Top: The observed values (red) compared with the expected values (grey, with interval). Below: The same numbers converted into relative differences, expressed in per cent (red=significant differences). Cyan bar: Time period 9 months after the "Russian flu" in January 1890.

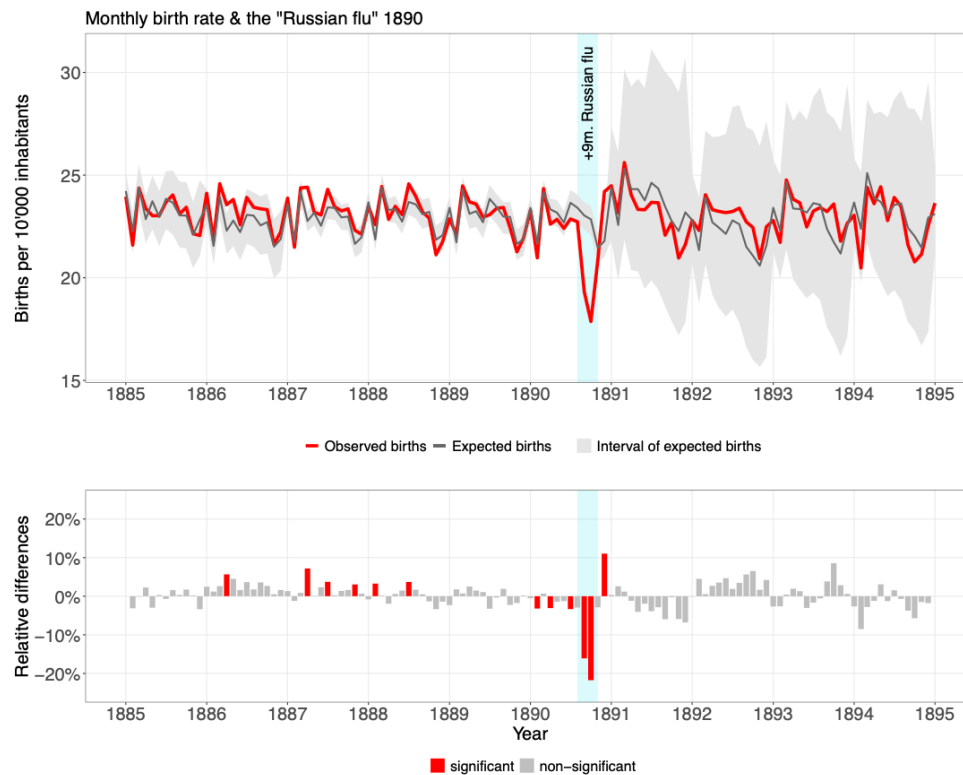

**Supplementary Figure S2:** The monthly live birth rate in Switzerland from 1912 to 1922. Top: The observed values (red) compared with the expected values (grey, with interval). Below: The same numbers converted into relative differences, expressed in per cent (red=significant differences). Cyan bars: Time period 9 months after the start of World War 1 and mobilization of troops in August 1914; Time period 9 months after the strong Fall/Winter wave of the “Spanish flu” 1918 and the worsening nutritional situation towards the end of the war; Time period 9 months after the strong later pandemic wave in February 1920.

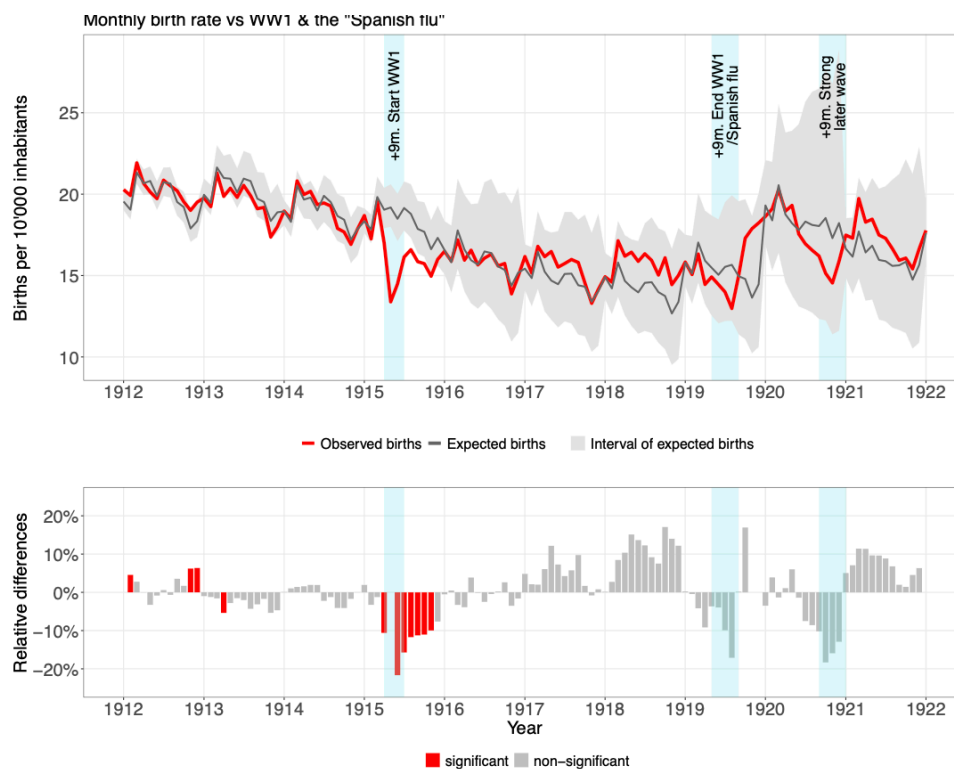

**Supplementary Figure S3:** The monthly live birth rate in Switzerland from 1952 to 1962. Top: The observed values (red) compared with the expected values (grey, with interval). Below: The same numbers converted into relative differences, expressed in per cent (red=significant differences). Cyan bar: Time period 9 months after the "Asian flu" in Fall 1957.

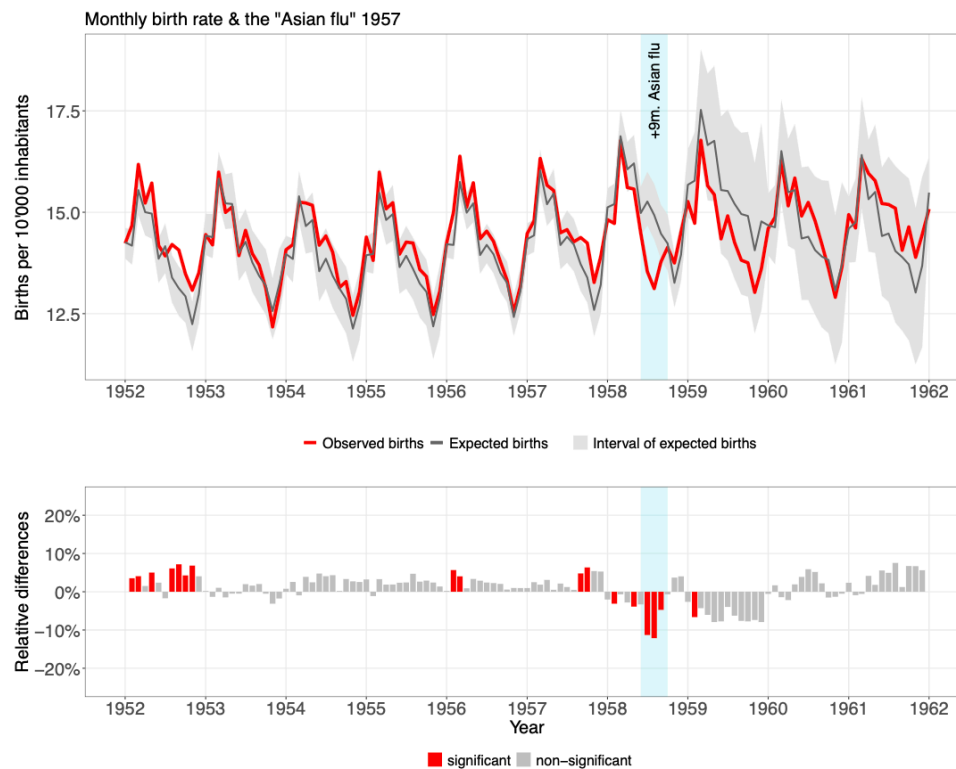

**Supplementary Figure S4:** The monthly live birth rate in Switzerland from 1964 to 1974 Top: The observed values (red) compared with the expected values (grey, with interval). Below: The same numbers converted into relative differences, expressed in per cent (red=significant differences). Cyan bars: The time periods 9 months after the two waves of the "Hong Kong flu" in Winter 1968/1969 and in Winter 1969/1970.

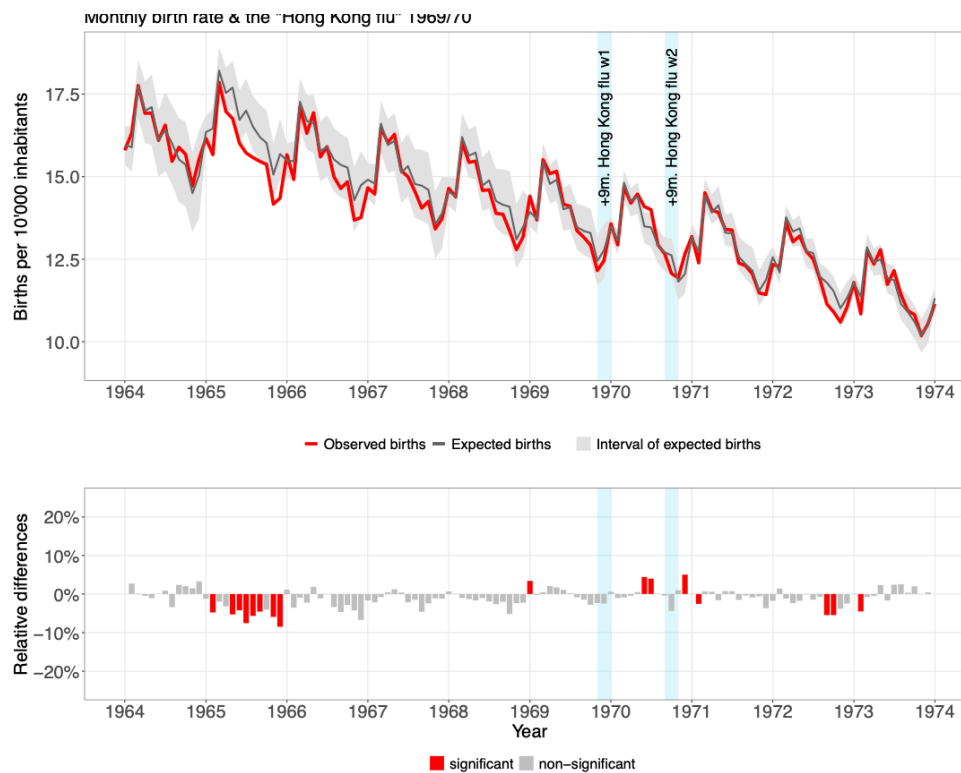

**Supplementary Figure S5:** The monthly live birth rate in Switzerland from 2004 to 2014. Top: The observed values (red) compared with the expected values (grey, with interval). Below: The same numbers converted into relative differences, expressed in per cent (red=significant differences). Cyan bar: The time period 9 months after the wave of the Swine flu in Fall and Winter 2009. Green bar: The time period 9 months after the Great Recession economic crises at the end of 2008 and the beginning of 2009.

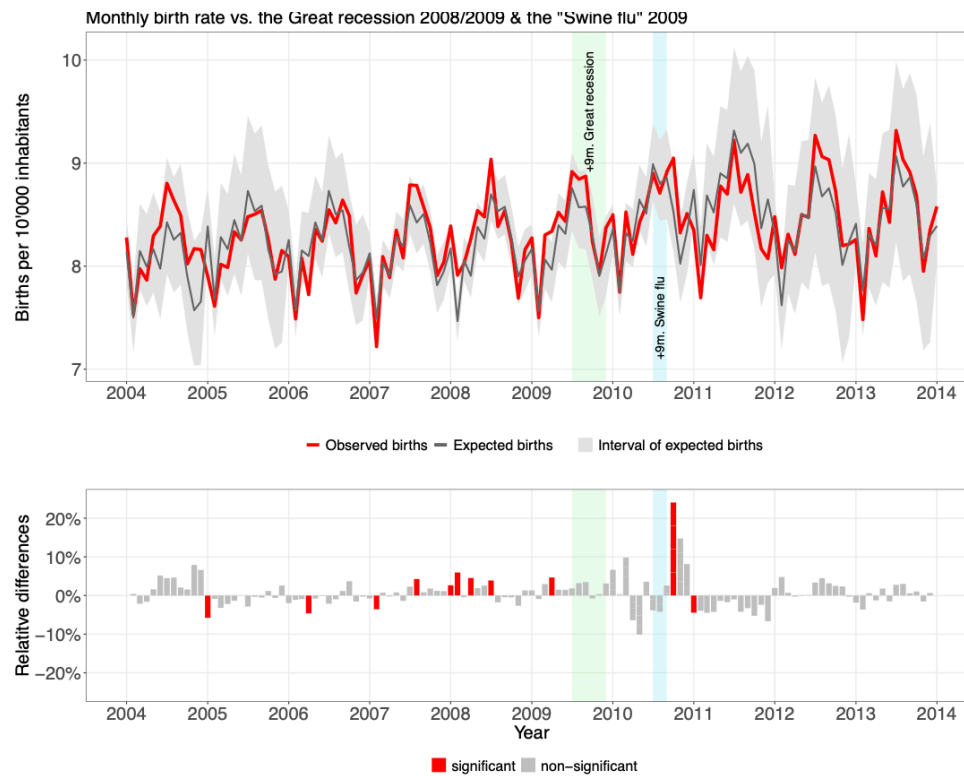



**Supplementary Figure S6:** The stable monthly trend in the sex ratio of all live births in Switzerland 2016 to 2023.

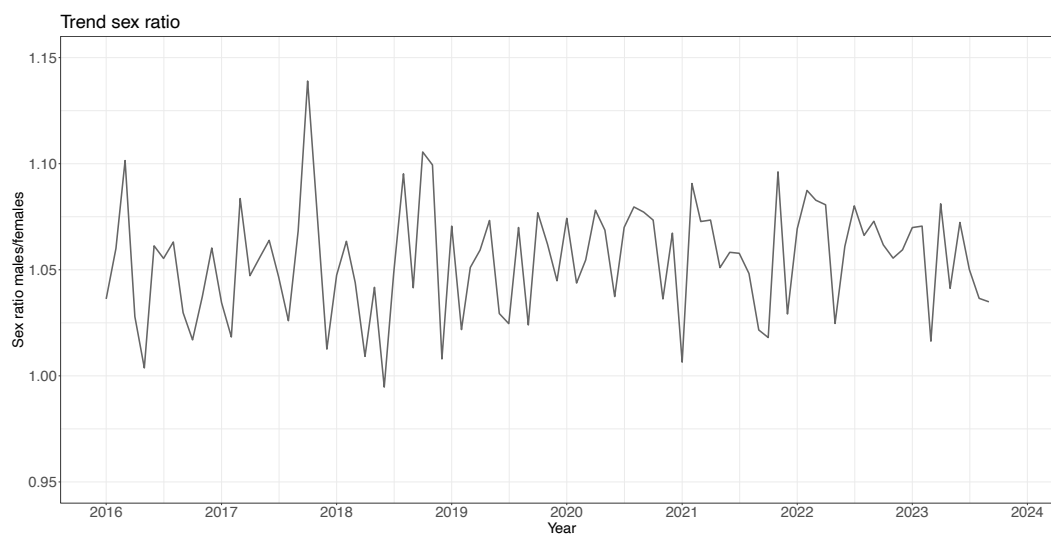

**Supplementary Figure S7:** To illustrate the context: A) The different waves of the COVID-19 pandemic in Switzerland, shown here using monthly hospitalisations; B) The monthly trend in the consumer price index in Switzerland; C) The monthly trend in the unemployment rate in Switzerland; D) The vaccination rate among 20–40-year-olds in Switzerland as of 2021 (grey=vaccinated once, black=vaccinated twice). a) The WHO declares the COVID-19 pandemic (dashed line); b) the first wave in spring 2020 (blue bar); c) the second wave in autumn/winter 2020 (blue bar); d) the official start of the vaccination campaign in Switzerland; e) around 10% of 20-40-year-olds have been vaccinated once (dashed line); f) the first wave of the Omicron coronavirus (blue bar); g) the start of the war in Ukraine (dashed line); h) the heatwave in summer 2022 (yellow bar); i) the WHO declares the end of the pandemic (dashed line).

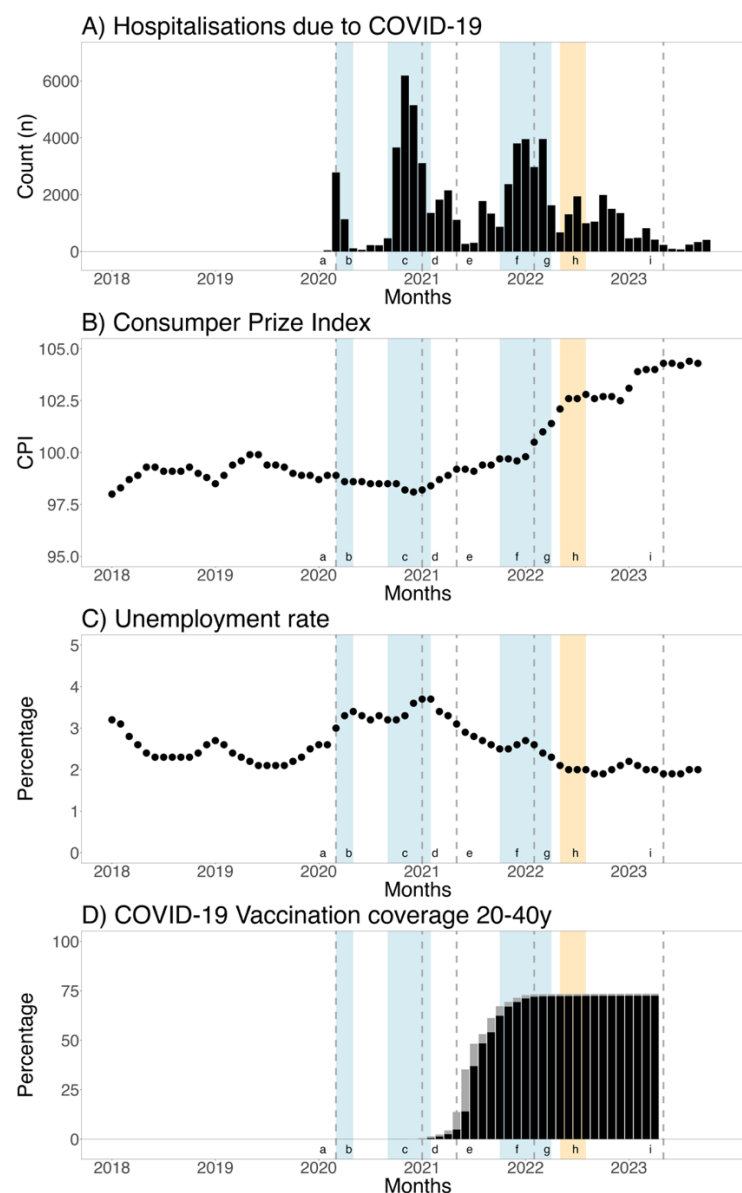

**Supplementary Figure S8:** To illustrate the economic context: A) Monthly consumer price index (CPI) and unemployment rate in Switzerland 2011 to 2023; B) Annual CPI, nominal and real wages in Switzerland 2011 to 2022. (Grey bar=time period of the COVID-19 pandemic)

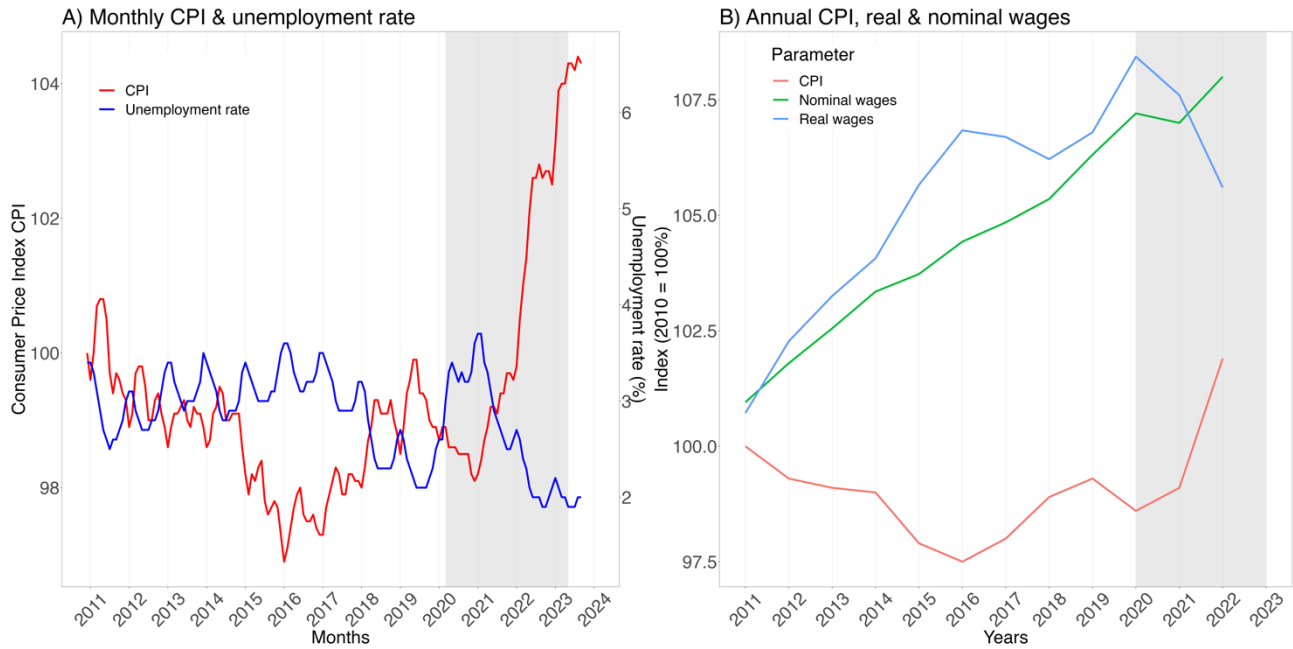

Source: https://medrxiv.org/content/10.1101/2023.12.05.23299432v1.full.pdf
